# Supplementary material
Source: HighWire-hosted journal article supplement (https://jnm.snmjournals.org/highwire/filestream/95143/field_highwire_adjunct_files/0/182881_Supplemental_Data.pdf)
Supplement: 182881_Supplemental_Data.pdf [file 182881_Supplemental_Data.pdf]

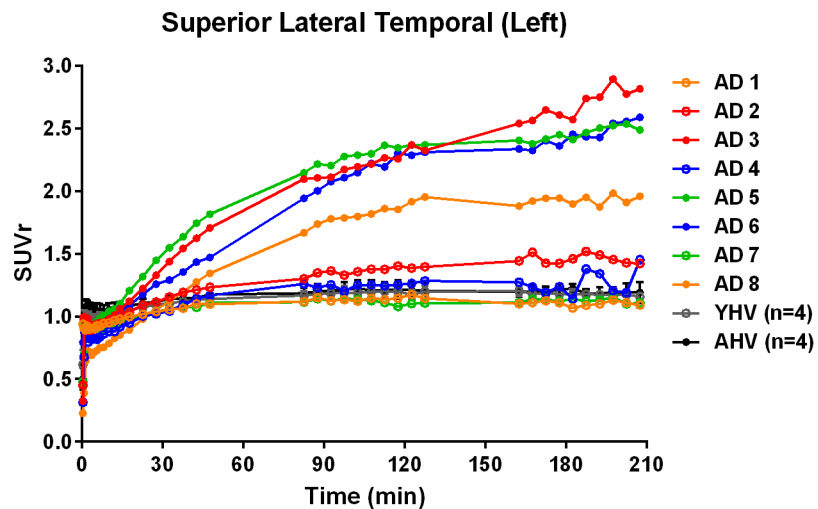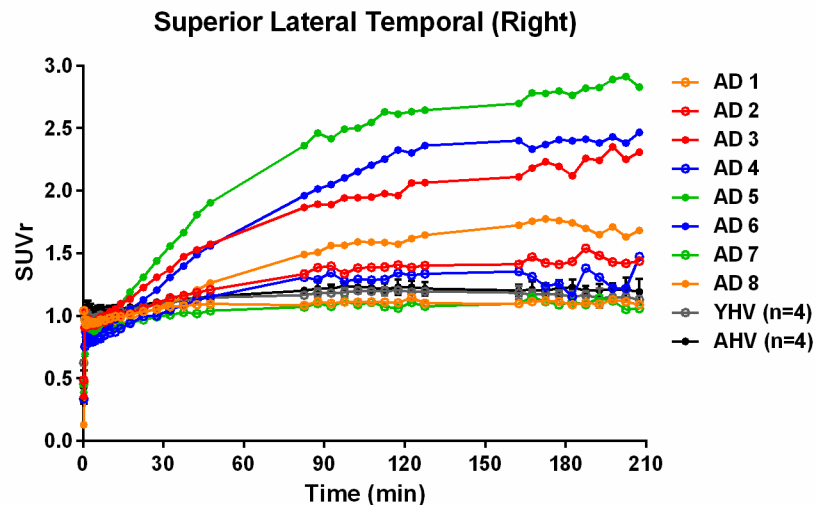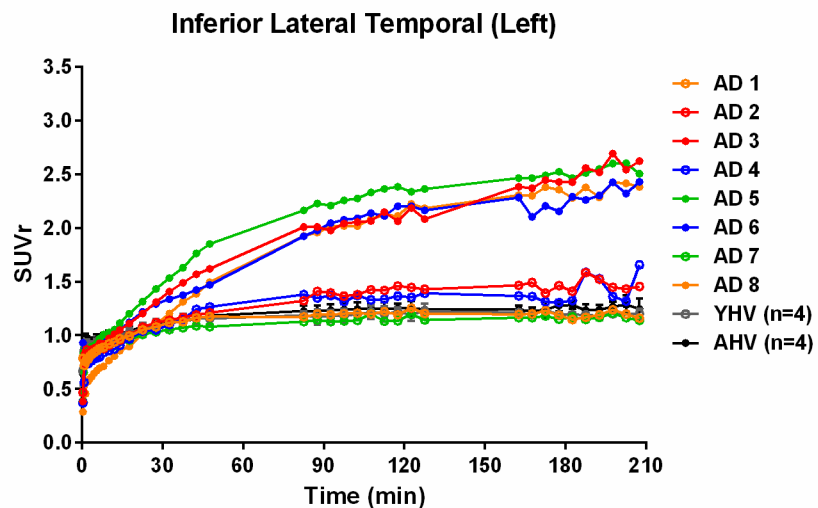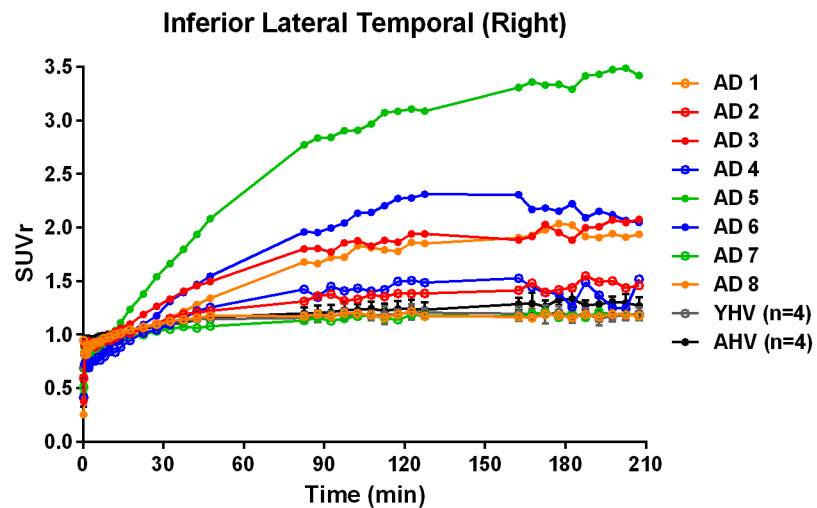

**SUPPLEMENTAL FIGURE 1:**  $^{18}\text{F}$ -AV-1451 SUVR curves in the superior and inferior lateral temporal cortex. Individual curves for the AD subjects and

average curves (mean  $\pm$  SD) for the healthy volunteers are reported. AD = Alzheimer's Disease subject; YHV = Young Healthy Volunteer; AHV = Aged Healthy Volunteer.

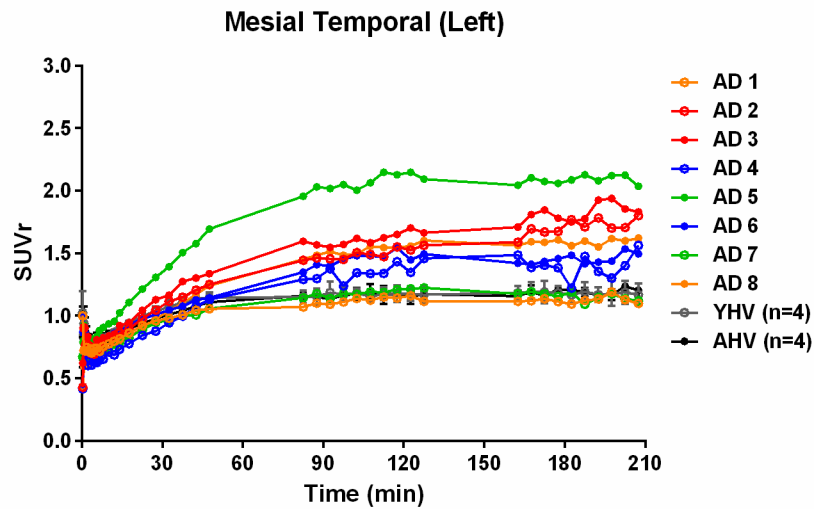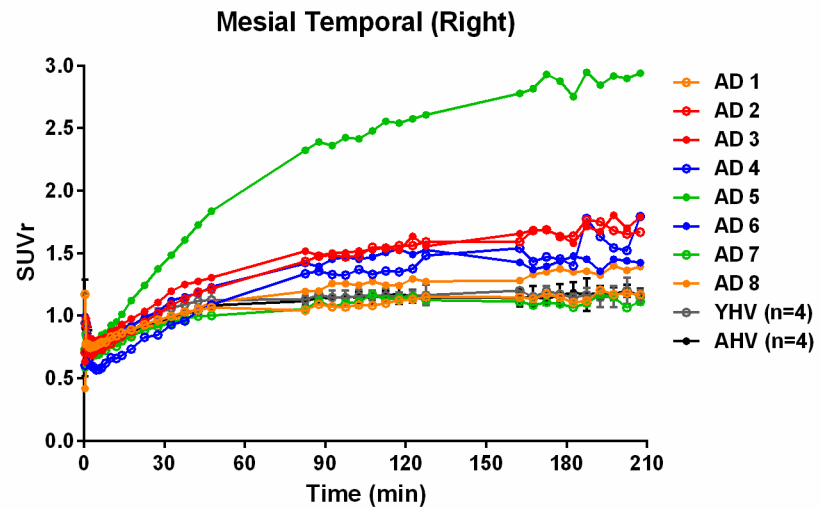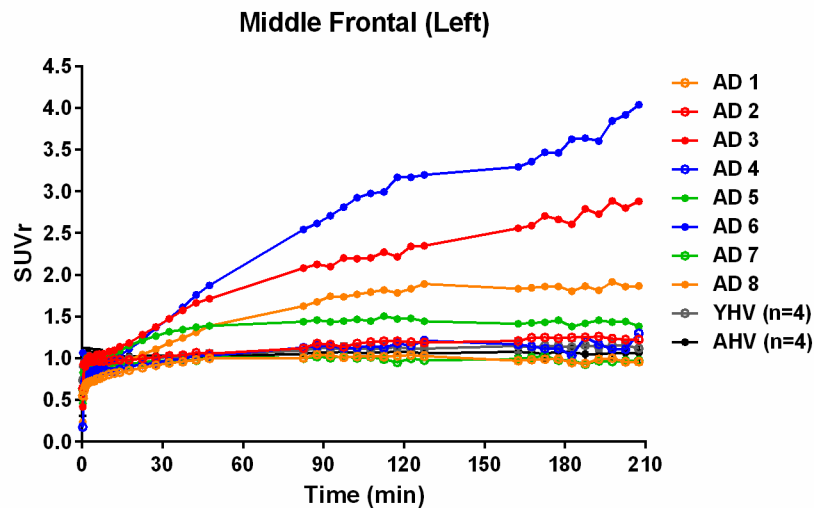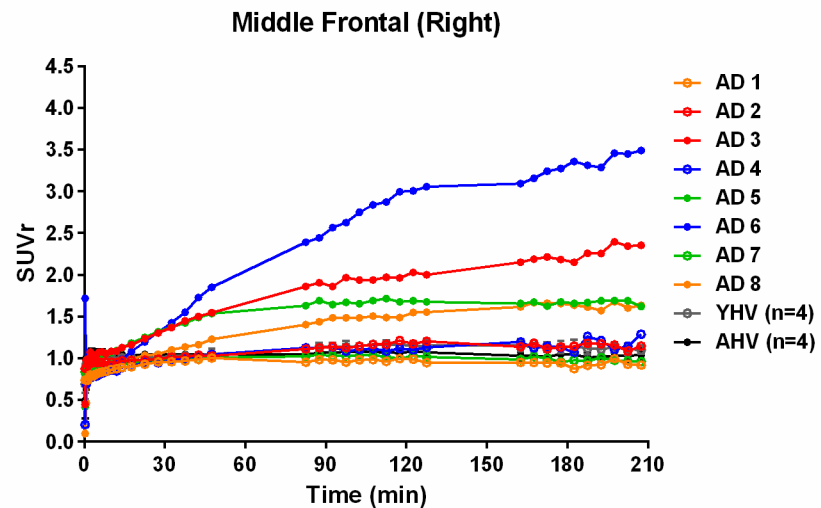

**SUPPLEMENTAL FIGURE 2:**  $^{18}\text{F}$ -AV-1451 SUVr curves in the mesial temporal cortex and the middle frontal cortex. Individual curves for the AD

subjects and average curves (mean  $\pm$  SD) for the healthy volunteers are reported. AD = Alzheimer's Disease subject; YHV = Young Healthy Volunteer; AHV = Aged Healthy Volunteer.

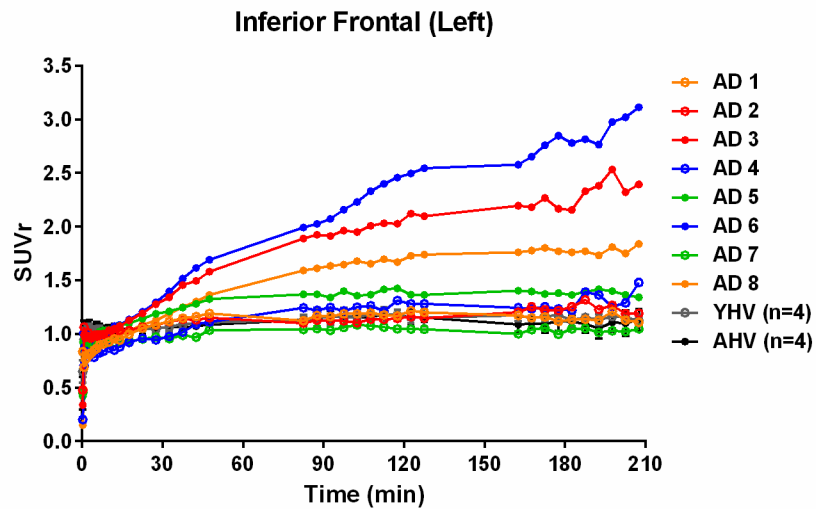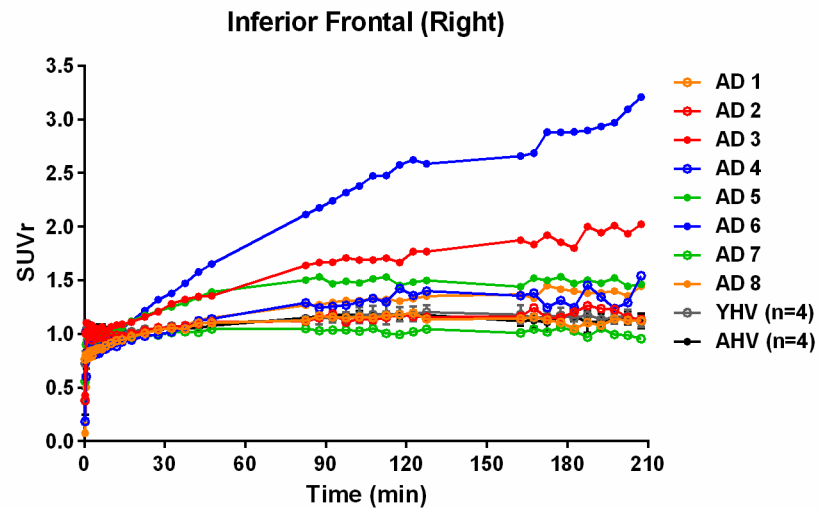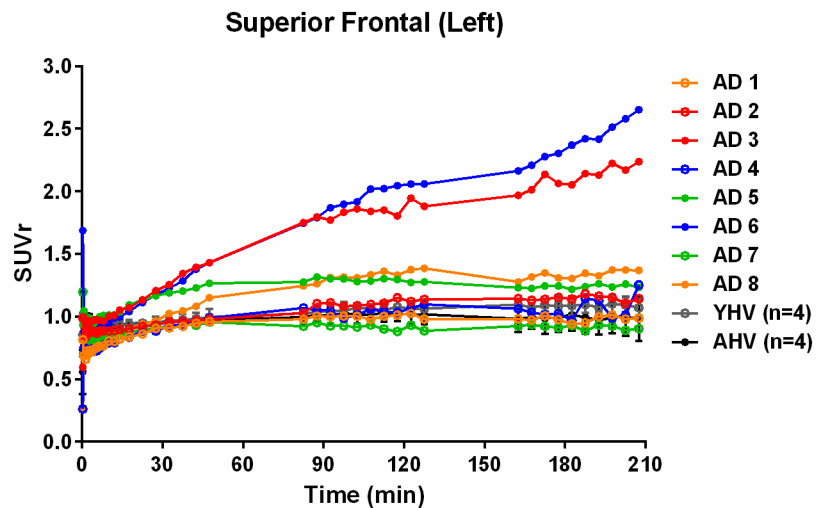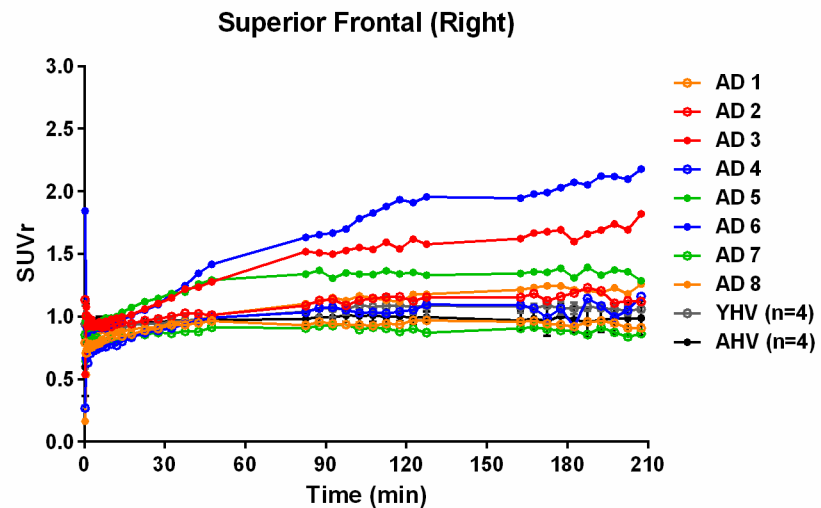

**SUPPLEMENTAL FIGURE 3:**  $^{18}\text{F}$ -AV-1451 SUVR curves in the inferior and superior frontal cortex. Individual curves for the AD subjects and average curves (mean  $\pm$  SD) for the healthy volunteers are reported. AD = Alzheimer's Disease subject; YHV = Young Healthy Volunteer; AHV = Aged Healthy Volunteer.

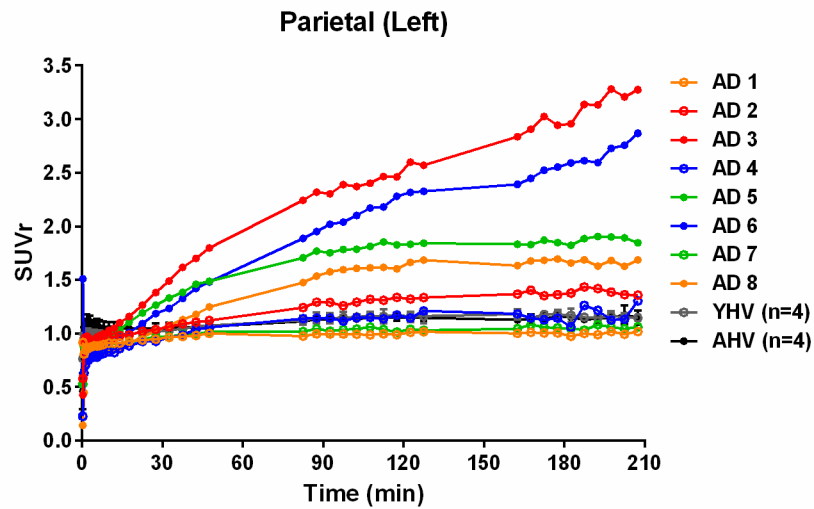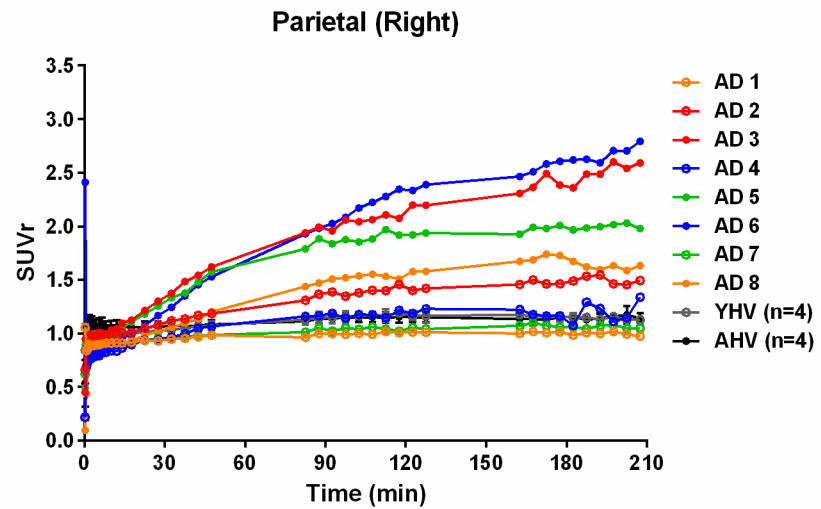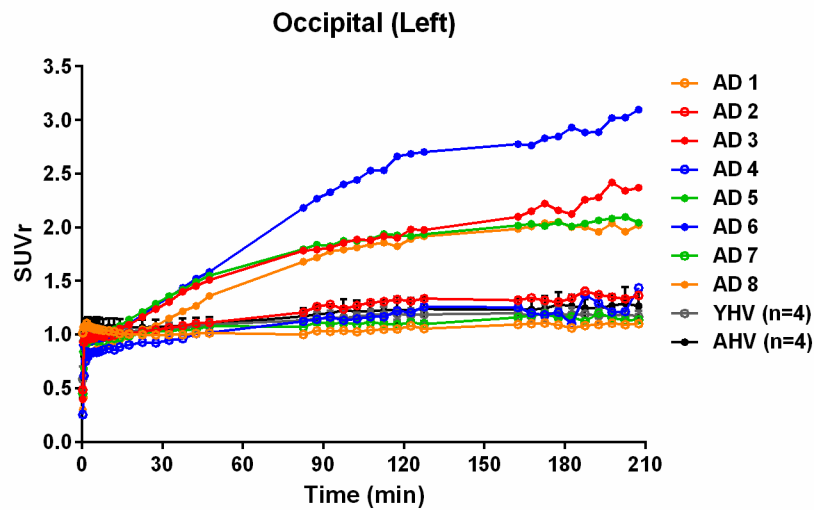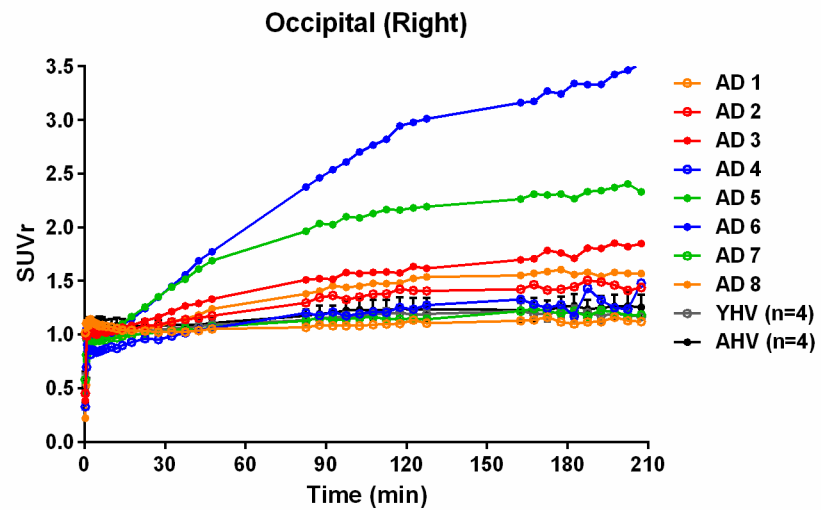

**SUPPLEMENTAL FIGURE 4:**  $^{18}\text{F}$ -AV-1451 SUVR curves in the parietal cortex and the occipital cortex. Individual curves for the AD subjects and

average curves (mean  $\pm$  SD) for the healthy volunteers are reported. AD = Alzheimer's Disease subject; YHV = Young Healthy Volunteer; AHV = Aged Healthy Volunteer.

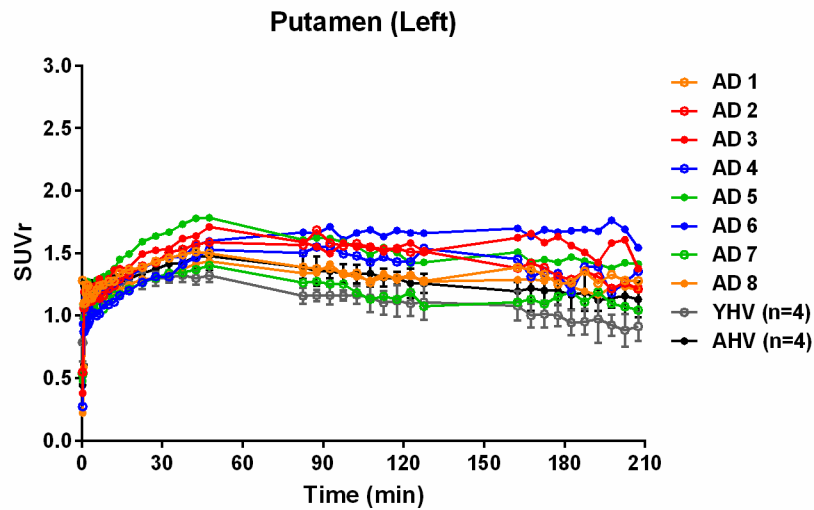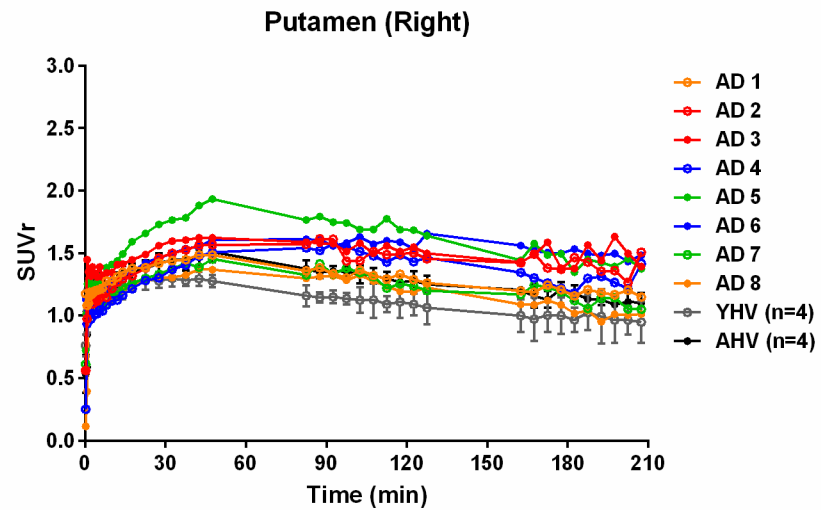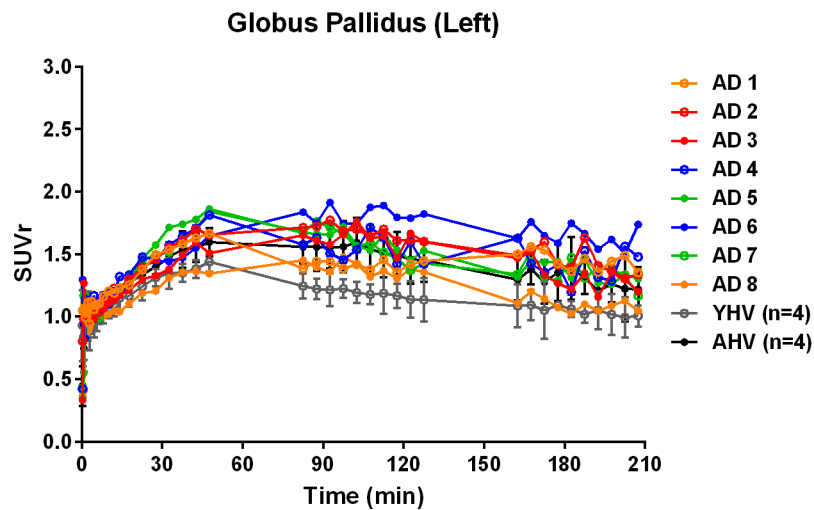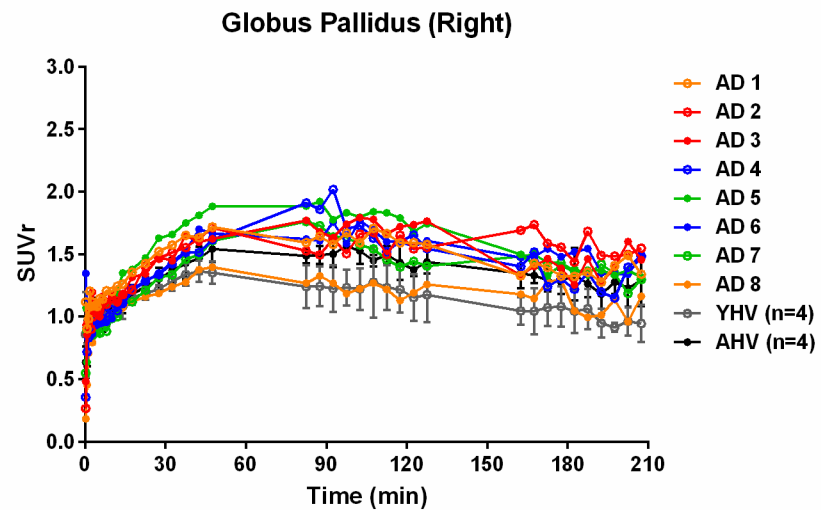

**SUPPLEMENTAL FIGURE 5:**  $^{18}\text{F}$ -AV-1451 SUVr curves in the putamen and the globus pallidus. Individual curves for the AD subjects and average curves (mean  $\pm$  SD) for the healthy volunteers are reported. AD = Alzheimer's Disease subject; YHV = Young Healthy Volunteer; AHV = Aged Healthy Volunteer.



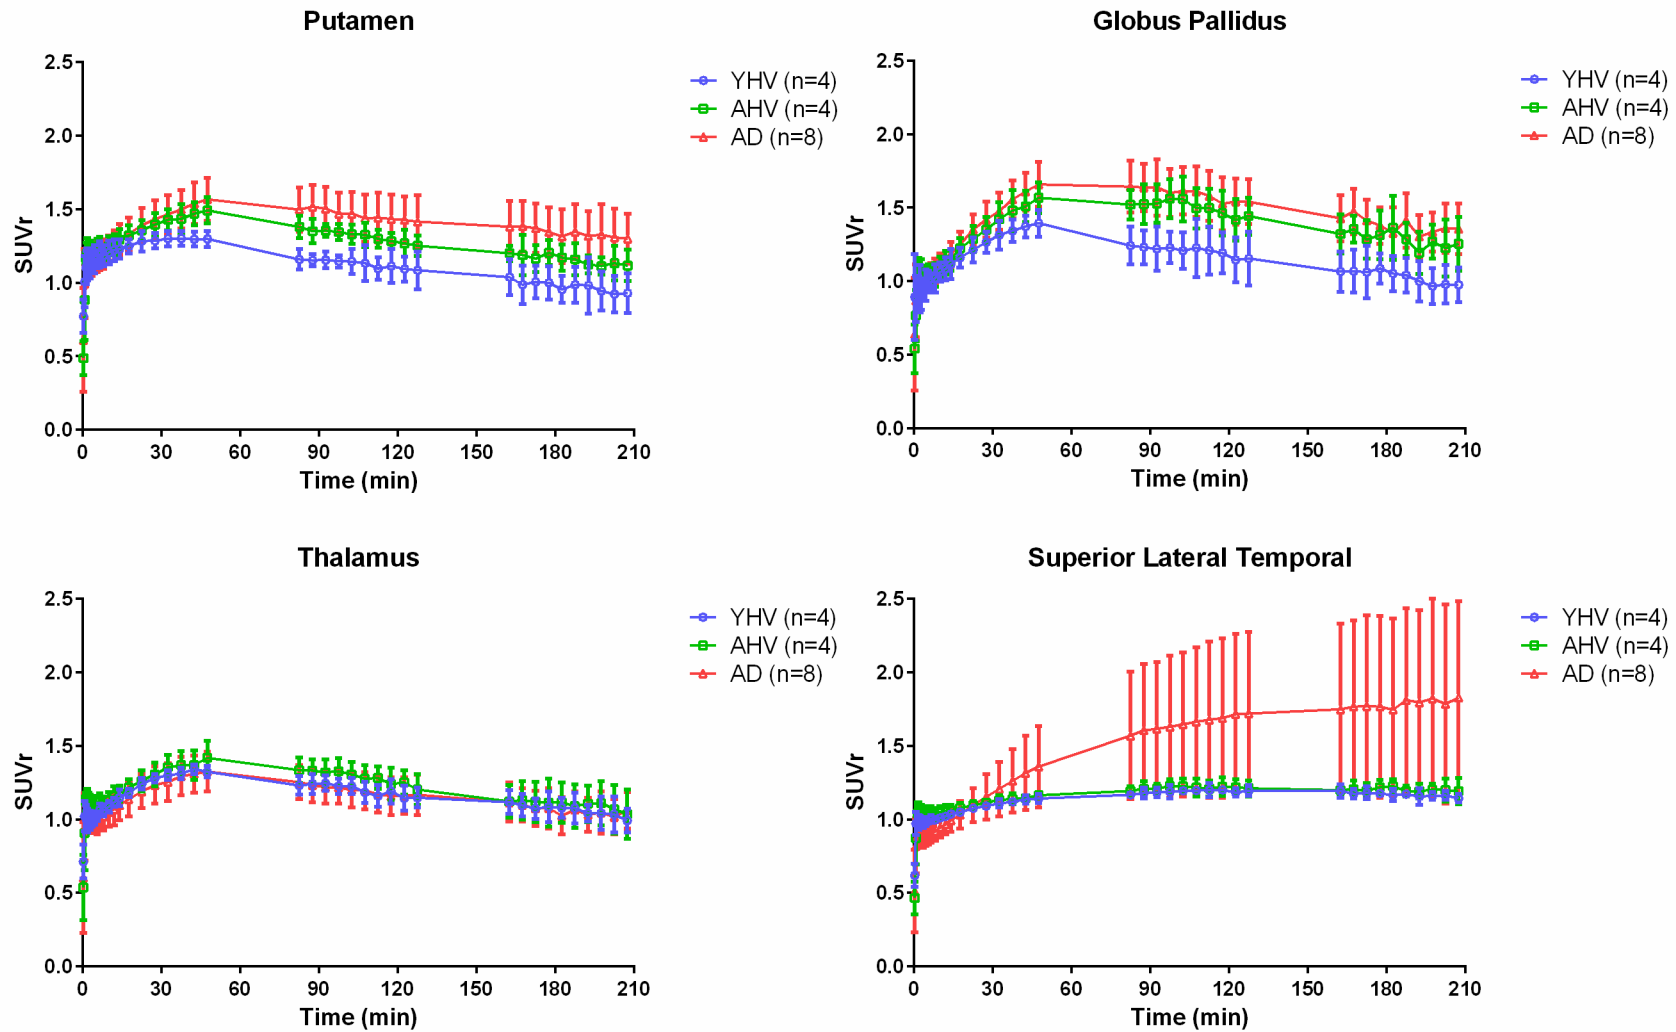

**SUPPLEMENTAL FIGURE 6:** Average (mean  $\pm$  SD)  $^{18}\text{F}$ -AV-1451 SUVR curves in the putamen, globus pallidus, thalamus and superior lateral temporal cortex for the AD subjects and the healthy volunteers. AD = Alzheimer's Disease subject; YHV = Young Healthy Volunteer; AHV = Aged Healthy Volunteer.

**SUPPLEMENTAL TABLE 1.** Regional values of  $\text{BP}_{\text{ND}}$  (2T, LGA and NI-LGA; 130 min of scanning data) and SUVR estimates.

|                   | <b>Group</b> | <b>Frontal</b> | <b>Parietal</b> | <b>Occipital</b> | <b>Lateral Temporal</b> | <b>Mesial Temporal</b> | <b>Putamen</b> |
|-------------------|--------------|----------------|-----------------|------------------|-------------------------|------------------------|----------------|
| 2T                | YHV          | 0.08±0.07      | 0.11±0.04       | 0.13±0.04        | 0.14±0.04               | 0.08±0.04              | 0.17±0.09      |
|                   | AHV          | 0.06±0.07      | 0.12±0.04       | 0.21±0.12        | 0.19±0.07               | 0.08±0.09              | 0.31±0.07      |
|                   | AD           | 0.37±0.48      | 0.47±0.46       | 0.54±0.55        | 0.62±0.53               | 0.35±0.36              | 0.41±0.13      |
| LGA               | YHV          | 0.08±0.06      | 0.11±0.04       | 0.14±0.04        | 0.15±0.03               | 0.08±0.03              | 0.16±0.08      |
|                   | AHV          | 0.06±0.06      | 0.12±0.04       | 0.18±0.08        | 0.17±0.04               | 0.06±0.04              | 0.30±0.07      |
|                   | AD           | 0.36±0.48      | 0.45±0.46       | 0.51±0.50        | 0.55±0.46               | 0.32±0.33              | 0.38±0.13      |
| NI-LGA            | YHV          | 0.07±0.06      | 0.10±0.03       | 0.13±0.04        | 0.14±0.03               | 0.08±0.03              | 0.18±0.06      |
|                   | AHV          | 0.05±0.06      | 0.11±0.03       | 0.16±0.07        | 0.16±0.04               | 0.05±0.04              | 0.33±0.07      |
|                   | AD           | 0.31±0.42      | 0.40±0.42       | 0.45±0.43        | 0.50±0.42               | 0.29±0.30              | 0.40±0.12      |
| SUVR-1<br>80-100  | YHV          | 0.10±0.06      | 0.14±0.05       | 0.15±0.05        | 0.18±0.04               | 0.16±0.05              | 0.15±0.05      |
|                   | AHV          | 0.08±0.07      | 0.13±0.03       | 0.20±0.07        | 0.21±0.05               | 0.15±0.03              | 0.36±0.06      |
|                   | AD           | 0.39±0.42      | 0.49±0.43       | 0.52±0.46        | 0.63±0.46               | 0.43±0.34              | 0.50±0.14      |
| SUVR-1<br>110-130 | YHV          | 0.13±0.07      | 0.17±0.05       | 0.19±0.05        | 0.20±0.04               | 0.17±0.05              | 0.10±0.09      |
|                   | AHV          | 0.08±0.08      | 0.15±0.04       | 0.23±0.10        | 0.23±0.06               | 0.16±0.05              | 0.28±0.07      |
|                   | AD           | 0.47±0.54      | 0.59±0.52       | 0.64±0.57        | 0.73±0.54               | 0.51±0.38              | 0.43±0.17      |
| SUVR-1<br>160-180 | YHV          | 0.13±0.06      | 0.17±0.03       | 0.20±0.06        | 0.19±0.04               | 0.18±0.05              | 0.01±0.12      |
|                   | AHV          | 0.05±0.09      | 0.14±0.03       | 0.24±0.10        | 0.24±0.06               | 0.16±0.05              | 0.19±0.08      |
|                   | AD           | 0.51±0.62      | 0.68±0.62       | 0.73±0.64        | 0.79±0.61               | 0.55±0.44              | 0.37±0.17      |

Values presented as mean±SD.

Average of left and right regions; Frontal = average of inferior, superior and middle; Lateral Temporal = average of superior and inferior.

YHV = Young Healthy Volunteer; AHV = Aged Healthy Volunteer; AD = Alzheimer's Disease subject.
